# Supplementary material for: Uranium hydroxide/oxide deposits on uranyl reduction
Source: Royal Society of Chemistry journal article supplement (doi:10.1039/d3ra02899b), 2023-01-01
Supplement: d3ra02899b1.pdf [file d3ra02899b1.pdf]

## Supplementary Information

### Uranium Hydroxide/Oxide Deposits on Uranyl Reduction

Kazuki Ouchi,\* Daiju Matsumura, Takuya Tsuji, Tohru Kobayashi, Haruyoshi Otobe and Yoshihiro Kitatsuji

**Abstract:** We clarified the chemical reaction of deposits following the reduction of uranyl ion ( $U^{VI}O_2^{2+}$ ) from the results of electrochemical quartz crystal microbalance, impedance spectra and X-ray absorption fine structure measurements. We propose the following deposition mechanism: 1)  $U^{IV}$  is formed by the disproportionation of  $U^V$ . 2)  $U^{IV}$  forms  $U^{IV}$  hydroxide deposits, and 3) finally, the hydroxide deposits change to  $U^{IV}$  oxide, generally having a larger electrical resistance than the former.

---

## Table of Contents

|                                                                                                                       |   |
|-----------------------------------------------------------------------------------------------------------------------|---|
| <b>Results</b>                                                                                                        | 3 |
| <b>Table S1</b> The results of fitting by the equivalent circuit of the electrode covered by 9.6 nmol of U deposits.  | 3 |
| <b>Table S2</b> The results of fitting by the equivalent circuit of the electrode covered by 21.1 nmol of U deposits. | 3 |

## Results

Table S1 The results of fitting by the equivalent circuit of the electrode covered by 9.6 nmol of U deposits.

|                          | 4 min                            | 20 min                           | 50 min                           | 80 min                           |
|--------------------------|----------------------------------|----------------------------------|----------------------------------|----------------------------------|
| $R_{sol} / \Omega$       | $(1.97 \pm 0.08) \times 10$      | $(2.11 \pm 0.03) \times 10$      | $(2.12 \pm 0.03) \times 10$      | $(2.11 \pm 0.03) \times 10$      |
| $R_{dep} / \Omega$       | $(1.3 \pm 0.2) \times 10$        | $(1.86 \pm 0.07) \times 10$      | $(2.00 \pm 0.08) \times 10$      | $(2.08 \pm 0.08) \times 10$      |
| $p_{CPE,dep}$            | $0.47 \pm 0.08$                  | $0.66 \pm 0.03$                  | $0.67 \pm 0.03$                  | $0.67 \pm 0.03$                  |
| $T_{CPE,dep} / Fs^{p-1}$ | $(10 \pm 6) \times 10^{-4}$      | $(1.3 \pm 0.3) \times 10^{-4}$   | $(1.0 \pm 0.3) \times 10^{-4}$   | $(9 \pm 3) \times 10^{-5}$       |
| $R_{ct} / \Omega$        | $(7.6 \pm 0.3) \times 10^4$      | $(1.03 \pm 0.03) \times 10^5$    | $(1.9 \pm 0.1) \times 10^5$      | $(2.05 \pm 0.01) \times 10^5$    |
| $p_{CPE,dl}$             | $0.993 \pm 0.003$                | $0.939 \pm 0.002$                | $0.928 \pm 0.002$                | $0.924 \pm 0.002$                |
| $T_{CPE,dl} / Fs^{p-1}$  | $(2.54 \pm 0.02) \times 10^{-4}$ | $(2.26 \pm 0.01) \times 10^{-4}$ | $(2.16 \pm 0.01) \times 10^{-4}$ | $(2.12 \pm 0.01) \times 10^{-4}$ |

Table S2 The results of fitting by the equivalent circuit of the electrode covered by 21.1 nmol of U deposits.

|                          | 4 min                            | 20 min                             | 50 min                             | 80 min                             |
|--------------------------|----------------------------------|------------------------------------|------------------------------------|------------------------------------|
| $R_{sol} / \Omega$       | $(1.97 \pm 0.02) \times 10$      | $(1.99 \pm 0.09) \times 10$        | $(1.98 \pm 0.01) \times 10$        | $(1.98 \pm 0.01) \times 10$        |
| $R_{dep} / \Omega$       | $(1.42 \pm 0.04) \times 10$      | $(2.13 \pm 0.02) \times 10$        | $(2.66 \pm 0.04) \times 10$        | $(2.88 \pm 0.04) \times 10$        |
| $p_{CPE,dep}$            | $0.47 \pm 0.02$                  | $0.514 \pm 0.007$                  | $0.5235 \pm 0.008$                 | $0.5210 \pm 0.008$                 |
| $T_{CPE,dep} / Fs^{p-1}$ | $(1.1 \pm 0.2) \times 10^{-3}$   | $(6.3 \pm 0.4) \times 10^{-4}$     | $(5.1 \pm 0.4) \times 10^{-4}$     | $(5.1 \pm 0.3) \times 10^{-4}$     |
| $R_{ct} / \Omega$        | $(1.5 \pm 0.5) \times 10^6$      | $(1.23 \pm 0.02) \times 10^5$      | $(1.22 \pm 0.03) \times 10^5$      | $(1.18 \pm 0.02) \times 10^5$      |
| $p_{CPE,dl}$             | $0.9895 \pm 0.0009$              | $0.9659 \pm 0.0008$                | $0.9498 \pm 0.0008$                | $0.9468 \pm 0.0008$                |
| $T_{CPE,dl} / Fs^{p-1}$  | $(5.70 \pm 0.01) \times 10^{-4}$ | $(4.930 \pm 0.006) \times 10^{-4}$ | $(4.737 \pm 0.008) \times 10^{-4}$ | $(4.594 \pm 0.008) \times 10^{-4}$ |
